# Supplementary material for: Exploring the relationships between perceptions of tutoring and tutoring behaviours: a focus on graduate students serving as peer tutors to college-level chemistry students
Source: Royal Society of Chemistry journal article supplement (doi:10.1039/c5rp00103j), 2015-01-01
Supplement: c5rp00103j1.pdf [file c5rp00103j1.pdf]

## **Investigating the Tutor Learning Effect: Relationships between Tutors' Perceptions of Tutoring and Tutors' Productive Behaviours**

Jonathan B. Velasco, Marilyne Stains\*  
Department of Chemistry  
University of Nebraska – Lincoln

### **Table of Contents**

|                                                                                                                                                      |    |
|------------------------------------------------------------------------------------------------------------------------------------------------------|----|
| Appendix A - Interview Materials .....                                                                                                               | 2  |
| A1. Interview protocol to examine tutors' perceptions of tutoring .....                                                                              | 2  |
| A2. Chart used to identify the characteristics of tutees .....                                                                                       | 3  |
| A3. Chart used to identify the characteristics of tutoring sessions .....                                                                            | 4  |
| A4. Chart used to identify the characteristics, skills, and actions of tutors.....                                                                   | 5  |
| A5. Chart used by interviewees to compare resource room teaching assistants (TAs) and tutors                                                         | 6  |
| A6. Chart used by interviewees to compare lecturers and TAs.....                                                                                     | 7  |
| Appendix B - Coding Book .....                                                                                                                       | 8  |
| B1. Codes used to examine tutors' behaviours, with operational definitions of<br>knowledge-telling (KT) and knowledge-building (KB) behaviours ..... | 8  |
| B2. Codes used to examine other knowledge-building behaviours .....                                                                                  | 9  |
| B3. Codes used to describe other, non-KB/KT behaviours .....                                                                                         | 9  |
| B4. Types of explanations and elaborated feedback.....                                                                                               | 10 |
| B5. Literature cited .....                                                                                                                           | 10 |

## Appendix A - Interview Materials

### A1. Interview protocol to examine tutors' perceptions of tutoring

- 1) What is tutoring?
- 2) What is the role of the tutor?
- 3) Let's talk about a typical tutoring session with you.
  - a. Where do you typically conduct your tutoring session?
  - b. Do you typically prepare for a tutoring session?
    - i. (if yes) How do you prepare?
    - ii. (if no) Why not?
  - c. Do you interact, prepare, or conduct the session differently with different tutees?
  - d. What do you do in between tutoring sessions?
  - e. Please describe a typical tutoring session from beginning to end.
- 4) What are the characteristics of good and bad tutees? Please use this chart (Appendix A1) to organize your thoughts.
- 5) What are the characteristics of good and bad tutoring sessions? Please use this chart (Appendix A2) to organize your thoughts.
- 6) What are the characteristics, skills, and actions of good and bad tutors? Please use this chart (Appendix A3) to organize your thoughts. If you can, use different colors of the pens provided to differentiate between characteristics, actions, and skills.
- 7) Please compare and contrast the characteristics, actions, and goals of tutors and teaching assistants (TAs). You may use this chart (Appendix A4) to organize your thoughts. If you can, use different colors of the pens provided to differentiate
- 8) Please compare and contrast the characteristics, actions, and goals of tutors and lecturers. You may use this chart (Appendix A5) to organize your thoughts.
- 9) What is the purpose of tutoring?
- 10) What do you think are the main goals of a tutoring session?
- 11) What are you trying to achieve throughout the entire semester?
- 12) In your opinion, what is the most important thing that you do as a tutor?
- 13) Do you find tutoring challenging? Why (or why not)?
- 14) Why do you tutor?
- 15) Do you think you get something out of being a tutor?

## A2. Chart used to identify the characteristics of tutees

## Characteristics of a \_\_\_\_\_ Tutee

Good

Bad

### A3. Chart used to identify the characteristics of tutoring sessions

Characteristics of \_\_\_\_\_ Tutoring Sessions

Good

Bad

#### A4. Chart used to identify the characteristics, skills, and actions of tutors

Characteristics, Skills, and Actions of a \_\_\_\_\_ Tutor

Good

Bad

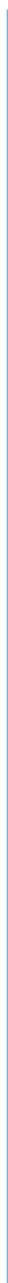

A5. Chart used by interviewees to compare resource room teaching assistants (TAs) and tutors

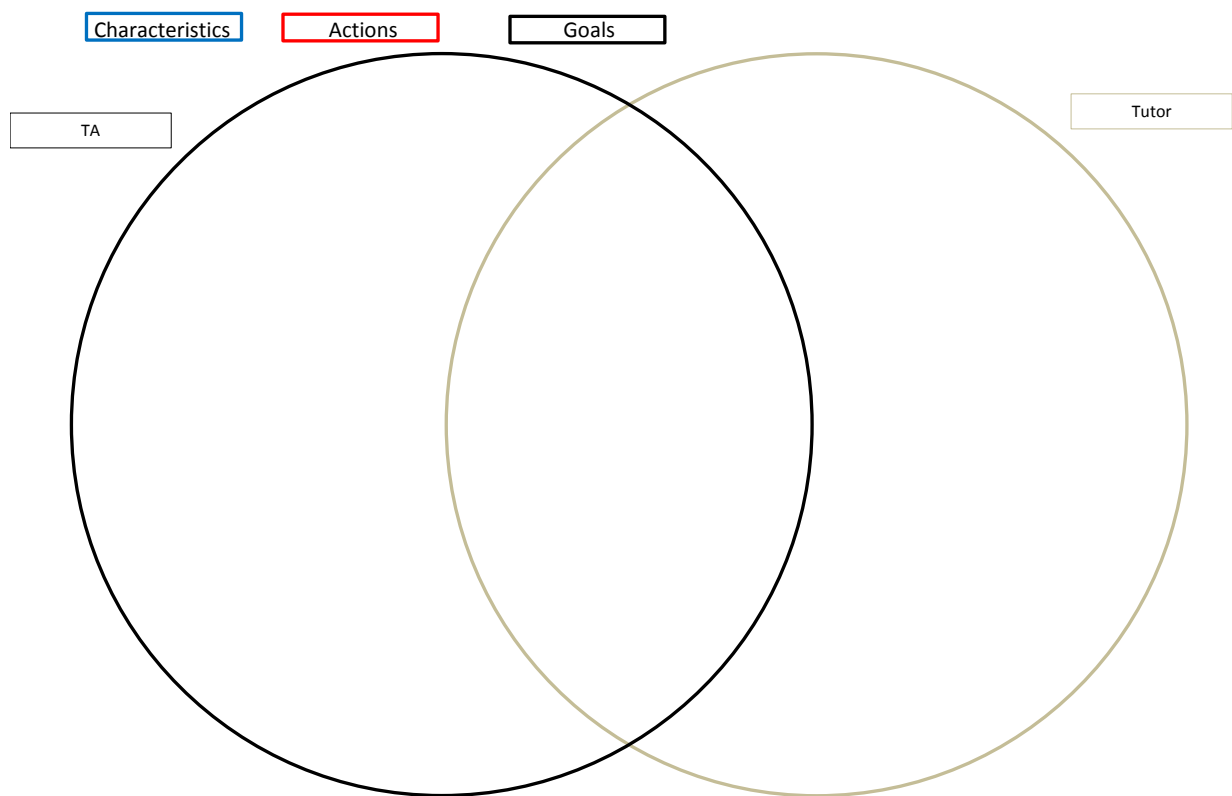

## A6. Chart used by interviewees to compare lecturers and TAs

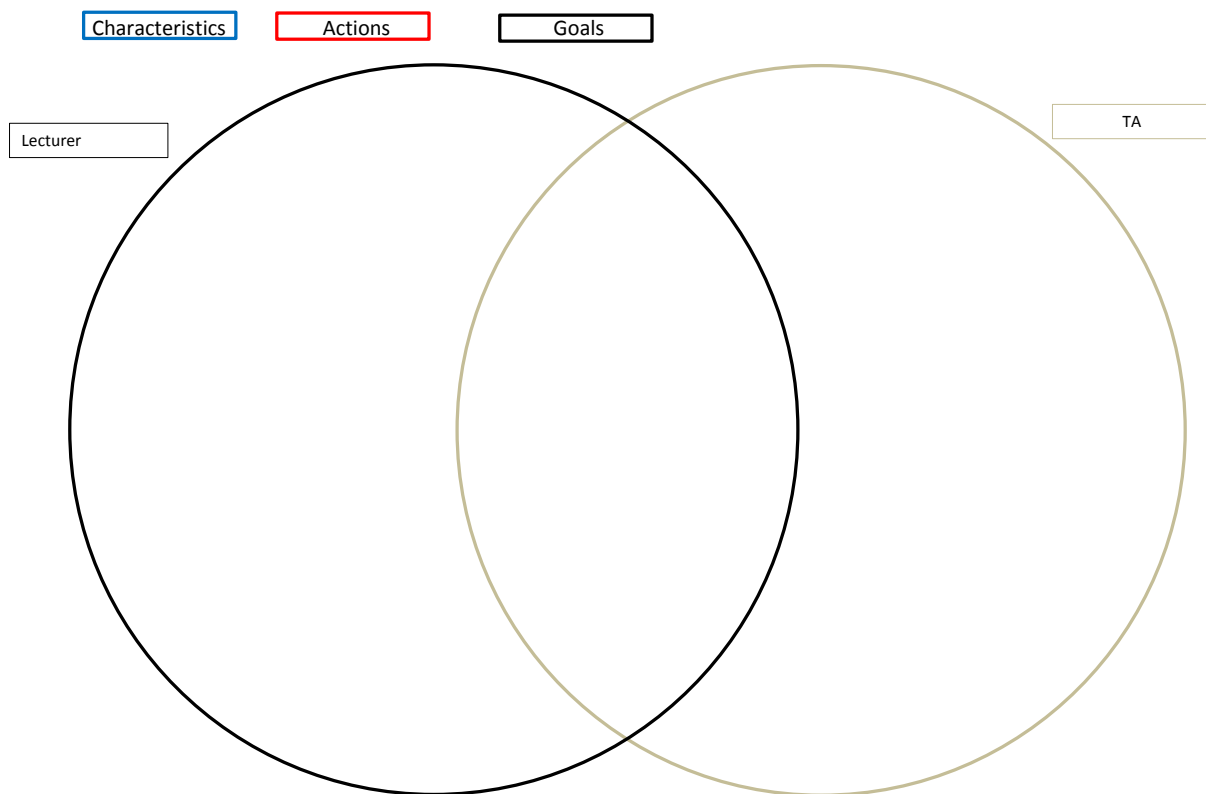

## Appendix B - Coding Book

B1. Codes used to examine tutors' behaviours, with operational definitions of knowledge-telling (KT) and knowledge-building (KB) behaviours

| <b>Tutor behaviour</b> | <b>KT definition</b>                                                                                        | <b>KB definition</b>                                                                                                        | <b>Non KT/KB definition</b>                                                                                                      |
|------------------------|-------------------------------------------------------------------------------------------------------------|-----------------------------------------------------------------------------------------------------------------------------|----------------------------------------------------------------------------------------------------------------------------------|
| <b>Explanations</b>    | Didactic lectures with little tutee participation (Fuchs <i>et al.</i> , 1994; Fuchs <i>et al.</i> , 1996)  | Responses to tutees' information-seeking questions (Roscoe, 2007)                                                           | N/A                                                                                                                              |
| <b>Feedback</b>        | Unelaborated, yes/no responses (Roscoe, 2007)                                                               | Tutor elaborating on tutee's answer (Graesser <i>et al.</i> , 1995)                                                         | N/A                                                                                                                              |
| <b>Questions</b>       | Questions that "did not contain or require any information beyond the text contents" (Roscoe and Chi, 2004) | Questions that "manifested logical reasoning, causal reasoning, or goal-oriented reasoning" (Graesser <i>et al.</i> , 1995) | Common ground question: Question that asks how well the listener is understanding or following along (Graesser and Person, 1994) |



## B2. Codes used to examine other knowledge-building behaviours

|                                  | Code                                                            | KB definition                                                                                                                         |
|----------------------------------|-----------------------------------------------------------------|---------------------------------------------------------------------------------------------------------------------------------------|
| Tutor's metacognitive behaviours | <i>Memory</i>                                                   | Tutor statements related to their own abilities to recall information (Roscoe, 2007)                                                  |
|                                  | <i>Comprehension</i>                                            | Tutor statements that focused on their own understanding of the material (Roscoe, 2007)                                               |
|                                  | <i>Attention</i>                                                | Tutor statements that indicated their perceptions of what was important in the material (Roscoe, 2007)                                |
| Tutor's scaffolding behaviours   | <i>Highlighting critical features</i>                           | Orienting tutee to important features of the problem (McArthur, <i>et al.</i> , 1990)                                                 |
|                                  | <i>Decomposing the task</i>                                     | Breaking up a complex task into simpler tasks (see Chi, <i>et al.</i> , 2001)                                                         |
|                                  | <i>Executing part/s of the skill</i>                            | Carrying out part/s of an activity (Rogoff, 1990)                                                                                     |
|                                  | <i>Compare current problem with a previously-solved problem</i> | Statements regarding similarities between current and previous problems (McArthur, <i>et al.</i> , 1990)                              |
|                                  | <i>Identifying/maintaining goal orientation</i>                 | Tutor statements that keep the tutees on task towards a goal (Wood, <i>et al.</i> , 1976)                                             |
|                                  | <i>Completing student reasoning</i>                             | Correcting student errors without acknowledging errors (Graesser, <i>et al.</i> , 1995)                                               |
|                                  | <i>Providing examples</i>                                       | Tutor statement that provides a relevant example (Chi, <i>et al.</i> , 2001)                                                          |
|                                  | <i>Evaluate solution</i>                                        | Evaluating the quality of student answers without confirming its accuracy (Graesser, <i>et al.</i> , 1995)                            |
|                                  | <i>Hints (as statements or as questions)</i>                    | Tutor providing hints to the tutee in order to solve a problem (King, <i>et al.</i> , 1998)                                           |
|                                  | <i>"What else" question</i>                                     | Tutor asks a probing question to have students expand on their responses (Graesser, <i>et al.</i> , 1995; King, <i>et al.</i> , 1998) |

## B3. Codes used to describe other, non-KB/KT behaviours

| Tutor's non-KB/KT behaviours | Definition                                              |
|------------------------------|---------------------------------------------------------|
| Reading text sentence        | Tutor reading text directly from a book or other source |
| Requests                     | Tutor requests the tutee to perform an action           |

#### B4. Types of explanations and elaborated feedback

| Classification | Definition                                                                                      |
|----------------|-------------------------------------------------------------------------------------------------|
| Conceptual     | Tutor engages the tutee with the conceptual underpinnings of the material                       |
| Procedural     | Tutor engages the tutee with algorithmic steps for problem solving (Fuchs <i>et al.</i> , 1994) |
| Bridging       | Tutor engages tutee with procedural statements connected to underlying concepts                 |
| Factual        | Tutor engages tutee with stand-alone definitions and facts                                      |

#### B5. Literature cited

- Chi M. T. H., Siler S. A., Jeong H., Yamauchi T. and Hausmann R. G., (2001), Learning from human tutoring, *Cognitive Sci.*, **24**, 471-533.
- Fuchs L. S., Fuchs D., Bentz J., Phillips N. B. and Hamlett C. L., (1994), The Nature of Student Interactions During Peer Tutoring With and Without Prior Training and Experience, *Am. Educ. Res. J.*, **31**, 75-103.
- Fuchs L. S., Fuchs D., Bentz J., Phillips N. B., Karns K. and Dutka S., (1996), The relation between student ability and the quality and effectiveness of explanations, *Am. Educ. Res. J.*, **33**, 631-664.
- Graesser A. C. and Person N. K., (1994), Question Asking During Tutoring, *Am. Educ. Res. J.*, **31**, 104-137.
- Graesser A. C., Person N. K. and Magliano J. P., (1995), Collaborative dialogue patterns in naturalistic one-to-one tutoring, *Appl. Cognitive Psych.*, **9**, 495-522.
- King A., Staffieri A. and Adelgais A., (1998), Mutual Peer Tutoring: Effects of Structuring Tutorial Interaction to Scaffold Peer Learning, *J. Educ. Psychol.*, **90**, 134-152.
- McArthur D., Stasz C. and Zmuidzinas M., (1990), Tutoring Techniques in Algebra, *Cognition and Instruction*, **7**, 197-244.
- Rogoff B., (1990), *Apprentice in thinking: cognitive development in social context*, New York, New York: Oxford Press.
- Roscoe R. D., (2007), *Opportunities and Barriers for Tutor Learning: Knowledge-Building, Metacognition, and Motivation*, Ph.D. Dissertation, University of Pittsburgh.
- Roscoe R. D. and Chi M., The influence of the tutee in learning by peer tutoring, 2004.
- Wood D., Bruner J. S. and Ross G., (1976), The Role of Tutoring in Problem Solving, *Journal of Child Psychology and Psychiatry*, **17**, 89-100.
